# Supplementary material for: The yield of risk stratification for sudden cardiac death in hypertrophic cardiomyopathy myosin-binding protein C gene mutation carriers: focus on predictive screening
Source: Oxford University Press journal article supplement (doi:10.1093/eurheartj/ehp539), 2009-12-16
Supplement: ehp539_Supplementary_Data.zip [file ehp539_Supplementary_Data.zip]

**Supplementary table** Clinical parameters and risk factors for SCD for different types of MYBPC3 gene mutations

| Clinical parameters                   | Other truncating mutations (n=50) | c.2373_2374insG (n=162) | Missense mutations (n=23) | P-value |
|---------------------------------------|-----------------------------------|-------------------------|---------------------------|---------|
| Age (yrs)                             | 41.6±18.6                         | 39.2±17.4               | 39.6±20.7                 | 0.715   |
| Male                                  | 29                                | 71                      | 8                         | 0.112   |
| Clinical diagnosis of HCM             | 8                                 | 42                      | 3                         | 0.176   |
| Palpitations                          | 14 (n=49)                         | 30 (n=161)              | 5 (n=23)                  | 0.326   |
| Chest pain                            | 4                                 | 9                       | 1                         | 0.769   |
| Atrial fibrillation                   | 0                                 | 1                       | 0                         | 0.798   |
| <i>Risk factors for SCD</i>           |                                   |                         |                           |         |
| Extreme left ventricular hypertrophy  | 0                                 | 4                       | 0                         | 0.400   |
| Non-sustained VT                      | 5 (n=42)                          | 10 (n=105)              | 1 (n=12)                  | 0.891   |
| Abnormal blood pressure response      | 4 (n=37)                          | 20 (n=111)              | 2 (n=12)                  | 0.588   |
| Previous cardiac arrest or VT         | 1                                 | 0                       | 0                         | 0.156   |
| Unexplained syncope                   | 2                                 | 8                       | 2                         | 0.688   |
| Family history of SCD                 | 12                                | 30                      | 4                         | 0.668   |
| <i>Number of risk factors for SCD</i> |                                   |                         |                           |         |
| 0 risk factors                        | 26                                | 98                      | 15                        | 0.264   |
| 1 risk factors                        | 24                                | 56                      | 7                         |         |
| ≥ 2 risk factors                      | 0                                 | 8                       | 1                         |         |

Data are mean±SD or number.

SCD, sudden cardiac death; VT, ventricular tachycardia.
